# Supplementary material
Source: publisher figshare collection journal article supplement (https://tandf.figshare.com/ndownloader/files/27909428)
Supplement: Supplementary file 1 [file 27909428]

## SUPPLEMENTARY MATERIAL

<https://doi.org/10.2989/00306525.2021.1897699>

*Ostrich 2021*

### Using digital photography to study moult extent in breeding seabirds

Alexis M Osborne and Peter G Ryan

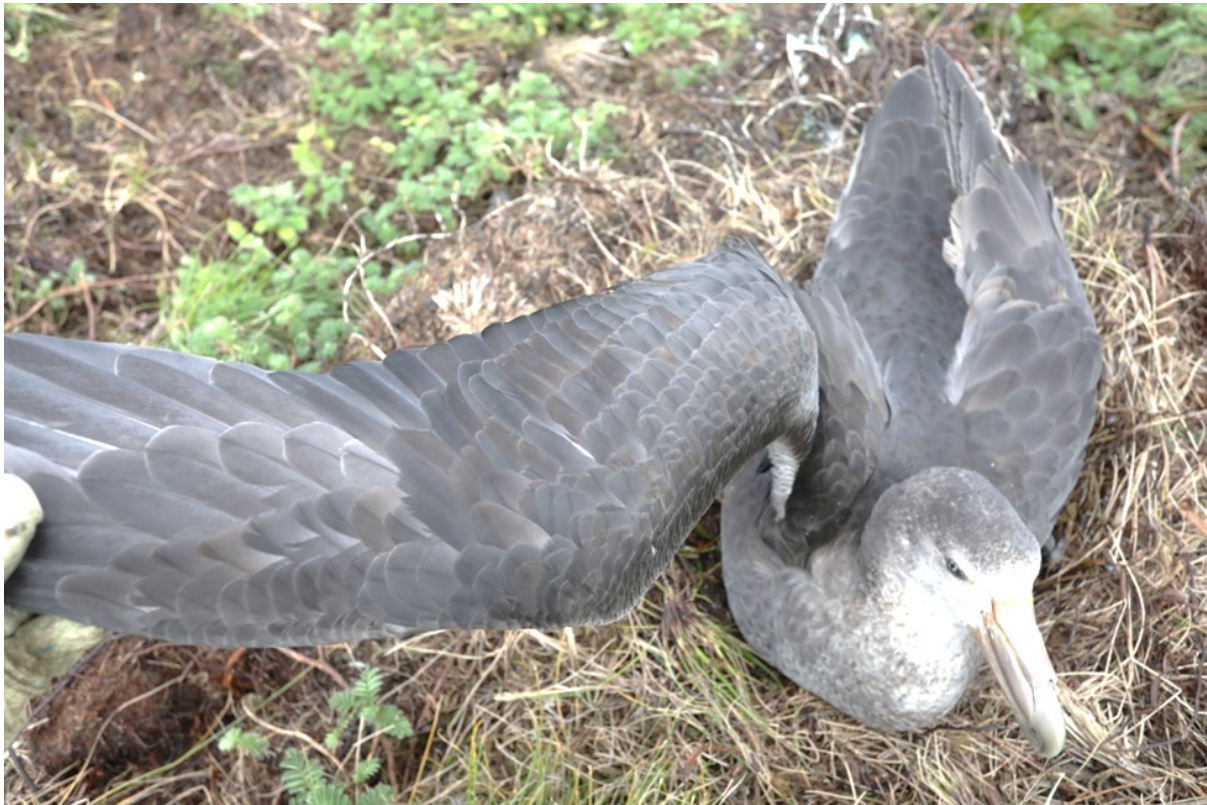

**Supplementary Figure 1:** Fieldworker gently extending the wing of an incubating Southern Giant Petrel without having to restrain the bird in preparation for taking moult photographs

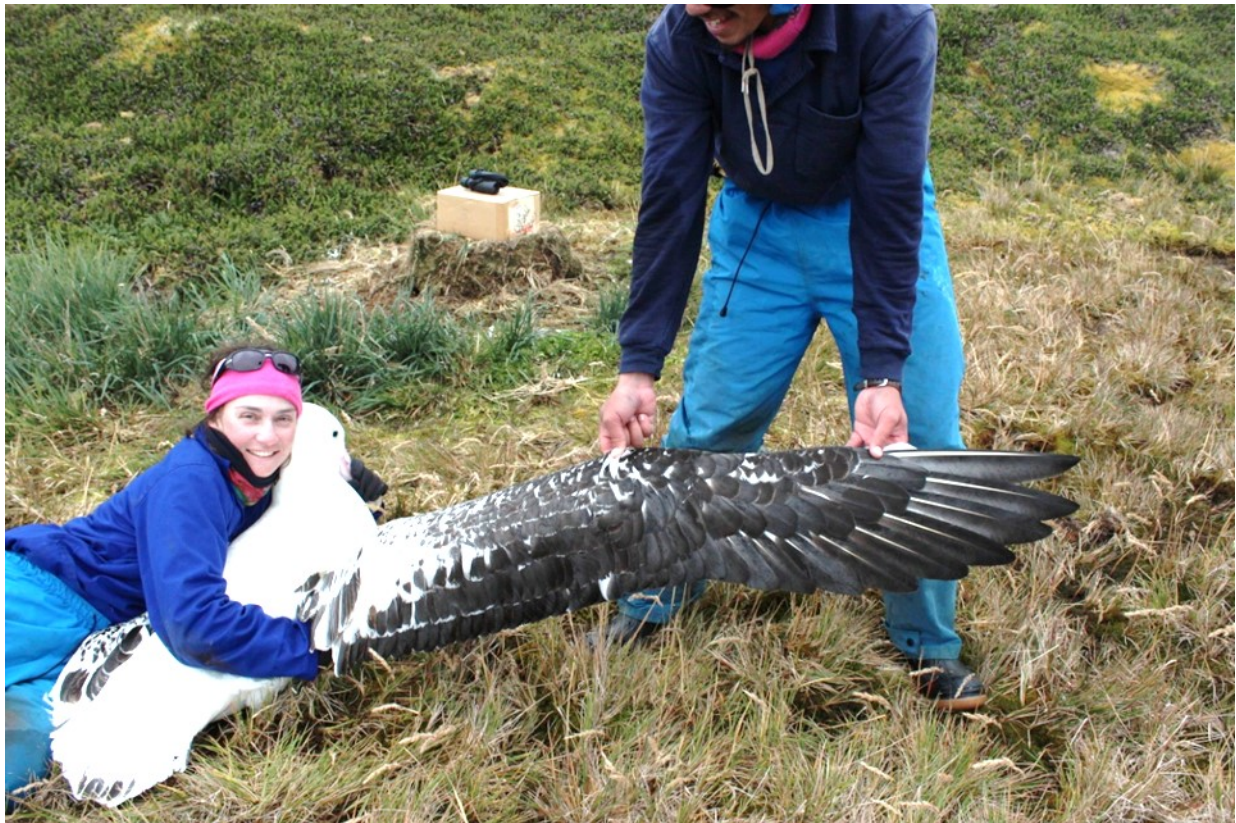

**Supplementary Figure 2:** Fieldworkers restrain a Wandering Albatross adjacent to its nest at Marion Island and spread one wing in preparation for taking moult photographs of the upper wing. Note box covering the egg on the nest to protect it from Brown Skuas *Stercorarius antarcticus*
